# Supplementary material
Source: publisher figshare collection journal article supplement (https://wiley.figshare.com/articles/dataset/_/3527999)
Supplement: Supplementary file 1 [file 1 › appendix-A.htm]

Ecological Archives E088-108-A1


### *Ecological Archives* E088-108-A1

### **J. Andrew Royle and Marc Kéry. 2007. A Bayesian state-space formulation of dynamic occupancy models. *Ecology* 88:1813–1823.**

Appendix A. Development of an MCMC algorithm by Gibbs sampling for a simple model. Click here for pdf file of the appendix.

---

  

[Back to E088-108]
