# Supplementary material
Source: publisher figshare collection journal article supplement (https://wiley.figshare.com/articles/dataset/_/3527999)
Supplement: Supplementary file 1 [file 1 › appendix-A.pdf]

**J. Andrew Royle and Marc Kery. 2007. A Bayesian state-space formulation of dynamic occupancy models. *Ecology* 88:1813–1823.**

**Appendix A: Development of an MCMC algorithm by Gibbs sampling for a simple model.**  
***Ecological Archives* E088-108-A1.**

## Appendix A: Full conditional distributions for $z(i, t)$

We adopt conventional uniform priors for the model parameters, so that  $\phi_t$ ,  $\gamma_t$  and  $\psi$  are all distributed as Uniform(0,1) random variables:  $\phi_t \sim \text{Uniform}(0, 1)$  and  $\gamma_t \sim \text{Uniform}(0, 1)$  for each  $t$ , and  $\psi_1 \sim \text{Uniform}(0, 1)$ . The full conditionals for model parameters are developed conditional on  $\{z(i, t)\}$ , i.e., as if each  $z(i, t)$  were known. We require summary statistics, the number of survival events, say  $n_{s,t}$ . This is the number of times  $z(i, t + 1) = 1$  given that  $z(i, t) = 1$ . We also must tabulate the number of potential survival events,  $N_{s,t}$ , i.e. the number of  $z(i, t) = 1$ . Similarly, we tabulate the number of colonization events,  $n_{c,t}$  and the number of potential colonization events,  $N_{c,t}$  (the frequency of  $z(i, t) = 0$ ). Note that  $\sum_i N_{s,t} + N_{c,t} = R \times (T - 1)$ . As an example of the calculation of these intermediate summaries, with 4 sites and 4 replicates, we have:

Table A.1: Example of calculating summary statistics for a case in which there are 4 sample sites and  $T = 4$ . The summary statistics are:  $n_{c,t}$  = the number of colonization events during the interval  $t - 1$  to  $t$ ,  $N_{c,t}$  = the number of unoccupied sites at time  $t - 1$ ,  $n_{s,t}$  = the number of survival events during the interval  $t - 1$  to  $t$ ,  $N_{s,t}$  = the number of occupied sites at time  $t - 1$ .

|     | Site |   |   |   | $n_{s,t}$ | $N_{s,t}$ | $n_{c,t}$ | $N_{c,t}$ |
|-----|------|---|---|---|-----------|-----------|-----------|-----------|
|     | 1    | 2 | 3 | 4 |           |           |           |           |
| t=1 | 1    | 0 | 0 | 1 | —         | —         | —         | —         |
| t=2 | 1    | 0 | 1 | 1 | 2         | 2         | 1         | 2         |
| t=3 | 0    | 0 | 1 | 1 | 2         | 3         | 0         | 1         |
| t=4 | 1    | 0 | 1 | 1 | 2         | 2         | 1         | 2         |

Given these summary statistics, the full-conditional distributions for each of the structural model parameters are:

$$(1) \quad \phi_t | \cdot \sim \text{Beta}(n_{s,t} + 1, N_{s,t} - n_{s,t} + 1)$$

$$(2) \quad \gamma_t | \cdot \sim \text{Beta}(n_{c,t} + 1, N_{c,t} - n_{c,t} + 1)$$

$$(3) \quad \psi_1 | \cdot \sim \text{Beta}(1 + \sum_i z(i, 1), 1 + R - \sum_i z(i, 1))$$

These have beta full-conditionals because the prior distributions are uniform, which is a  $\text{beta}(1,1)$ , the conjugate prior for the binomial likelihood.

Obtaining the full conditionals for  $z(i, t)$  is somewhat more involved, however, analytic forms exist. For  $1 < t < T$  the full conditional of  $z(i, t)$  is proportional to the product

$$z(i, t) | y(i, t), z(i, t - 1), z(i, t + 1) \propto [y(i, t) | z(i, t)] [z(i, t) | z(i, t - 1), z(i, t + 1)] \quad (\text{A.1})$$

Dependence on dynamical parameters has been suppressed. The problem can be simplified by considering first the conditional distribution  $[z(i, t) | z(i, t + 1), z(i, t - 1)]$  (i.e., in the absence of data). For clarity, we omit the  $i$  subscript in this development, and suppose that  $t = 1, 2, 3$ . The full conditionals can be developed algebraically for the 4 possible combinations of  $z(i, t - 1)$  and  $z(i, t + 1)$ . Consider the case  $T = 3$ , and calculation of the full conditional for  $z_2$ . The 4 cases, corresponding to possible values of  $z(1)$  and  $z(3)$  are  $(1, z_2, 1)$ ,  $(0, z_2, 1)$ ,  $(1, z_2, 0)$  and  $(0, z_2, 0)$ . Given  $(1, z_2, 1)$ , there are 2 possible sequences  $(1, 1, 1)$  and  $(1, 0, 1)$ . The probability of the first is  $\phi_1 \phi_2$  since  $z_2 = 1$  implies that there was

a survival event between  $t = 1$  and  $t = 2$  and also between  $t = 2$  and  $t = 3$ . The probability of obtaining the second is  $(1 - \phi_1)\gamma_2$ . Thus,

$$\psi_{condl} = Pr(z_2 = 1 | z_1 = 1, z_3 = 1) = \frac{\phi_1\phi_2}{\phi_1\phi_2 + (1 - \phi_1)\gamma_2} \quad (\text{A.2})$$

(the denominator being the sum of the 2 possibilities). Repeating this for the other 3 cases, we see that  $\psi_{condl}$  has 4 potential values depending on the previous and subsequent values of  $z(i, t)$ , those being:

$$\begin{aligned} (1, X, 1) : \psi_{condl} &= \frac{\phi_{t-1}\phi_t}{\phi_{t-1}\phi_t + (1 - \phi_{t-1})\gamma_t} \\ (0, X, 1) : \psi_{condl} &= \frac{\gamma_{t-1}\phi_t}{\gamma_{t-1}\phi_t + (1 - \gamma_{t-1})\gamma_t} \\ (1, X, 0) : \psi_{condl} &= \frac{\phi_{t-1}(1 - \phi_t)}{\phi_{t-1}(1 - \phi_t) + (1 - \phi_{t-1})(1 - \gamma_t)} \\ (0, X, 0) : \psi_{condl} &= \frac{\gamma_{t-1}(1 - \phi_t)}{\gamma_{t-1}(1 - \phi_t) + (1 - \gamma_{t-1})(1 - \gamma_t)} \end{aligned}$$

This yields the full-conditional for  $z(i, t)$  given  $z(i, t + 1)$  and  $z(i, t - 1)$  (i.e., this is the 2nd component on the RHS of Eq. (A.1). That is,  $z(i, t)$  is Bernoulli with parameter  $\psi_{condl}$ , which is dependent on  $z_1$  and  $z_3$  (or  $z_{t-1}$  and  $z_{t+1}$ , in general).

We now apply Bayes' Rule recursively, using this Bernoulli distribution as the prior distribution for updating the likelihood  $[y(i, t) | z(i, t)]$  (the first term on the RHS of Eq.

(A.1)). Basic probability calculus yields that

$$Pr(z(i, t)=1|y(i, t)=0) = \frac{(1-p)^T \psi_{condl}}{(1-p)^T \psi_{condl} + (1-\psi_{condl})}.$$

Finally, updating the first and last values of  $z(i, t)$  requires only a slight modification to these expressions, simplifying Eq. (A.2) to account for the fact that there is only one value of  $z$  being conditioned on – that being  $z(i, 2)$  in the case of updating  $z(i, 1)$ , and  $z(i, T-1)$  in the case of updating  $z(i, T)$ . In both cases, there are only 2 possible values of  $\psi_{condl}$  instead of four.
